# Supplementary material for: Chitosan Coating Functionalized with Flaxseed Oil and Green Tea Extract as a Bio-Based Solution for Beef Preservation
Source: MDPI journal article supplement (doi:10.3390/foods12071447), 2023-03-29
Supplement: s1 [file s1]

**Table S1.** pH and contact angle of the Ch–GTE coating solution formulations containing FO, TO, and OO, according to the CCRD matrix.

| Biopolymer | Concentration (%) | Essential Oil | Concentration (%) | pH        | Contact angle (°) |
|------------|-------------------|---------------|-------------------|-----------|-------------------|
| Chitosan   | 0.5               | Flaxseed      | 0.03              | 5.5 ± 0.1 | 16.9 ± 0.1        |
|            | 2                 |               | 0.03              | 5.9 ± 0.1 | 19.6 ± 0.2        |
|            | 0.5               |               | 0.1               | 5.5 ± 0.1 | 17.1 ± 0.2        |
|            | 2                 |               | 0.1               | 5.8 ± 0.1 | 22.3 ± 0.4        |
|            | 0.19              |               | 0.06              | 5.3 ± 0.0 | 14.9 ± 0.1        |
|            | 2.31              |               | 0.06              | 5.8 ± 0.1 | 23.7 ± 0.5        |
|            | 1.25              |               | 0.01              | 5.6 ± 0.1 | 17.9 ± 0.2        |
|            | 1.25              |               | 0.12              | 5.7 ± 0.1 | 17.1 ± 0.3        |
|            | 1.25              |               | 0.06              | 5.8 ± 0.0 | 19.1 ± 0.2        |
|            | 1.25              |               | 0.06              | 5.7 ± 0.1 | 18.9 ± 0.3        |
|            | 1.25              |               | 0.06              | 5.8 ± 0.0 | 19.0 ± 0.1        |
| Chitosan   | 0.5               | Thyme         | 0.03              | 5.5 ± 0.1 | 15.5 ± 0.2        |
|            | 2                 |               | 0.03              | 5.8 ± 0.1 | 17.3 ± 0.2        |
|            | 0.5               |               | 0.1               | 5.4 ± 0.1 | 13.4 ± 0.3        |
|            | 2                 |               | 0.1               | 5.7 ± 0.1 | 14.9 ± 0.4        |
|            | 0.19              |               | 0.06              | 5.4 ± 0.0 | 13.3 ± 0.5        |
|            | 2.31              |               | 0.06              | 5.7 ± 0.1 | 18.2 ± 0.3        |
|            | 1.25              |               | 0.01              | 5.7 ± 0.1 | 17.5 ± 0.4        |
|            | 1.25              |               | 0.12              | 5.6 ± 0.1 | 14.9 ± 0.3        |
|            | 1.25              |               | 0.06              | 5.6 ± 0.0 | 18.3 ± 0.2        |
|            | 1.25              |               | 0.06              | 5.7 ± 0.1 | 17.9 ± 0.3        |
|            | 1.25              |               | 0.06              | 5.6 ± 0.0 | 18.0 ± 0.4        |
| Chitosan   | 0.5               | Oregano       | 0.03              | 5.4 ± 0.1 | 11.6 ± 0.1        |
|            | 2                 |               | 0.03              | 5.5 ± 0.1 | 17.4 ± 0.2        |
|            | 0.5               |               | 0.1               | 5.2 ± 0.1 | 15.5 ± 0.2        |
|            | 2                 |               | 0.1               | 5.5 ± 0.1 | 17.9 ± 0.4        |
|            | 0.19              |               | 0.06              | 5.1 ± 0.0 | 13.4 ± 0.4        |
|            | 2.31              |               | 0.06              | 5.6 ± 0.1 | 18.5 ± 0.3        |
|            | 1.25              |               | 0.01              | 5.4 ± 0.1 | 16.6 ± 0.2        |
|            | 1.25              |               | 0.12              | 5.4 ± 0.1 | 14.9 ± 0.3        |
|            | 1.25              |               | 0.06              | 5.4 ± 0.0 | 14.7 ± 0.2        |
|            | 1.25              |               | 0.06              | 5.5 ± 0.1 | 14.9 ± 0.3        |
|            | 1.25              |               | 0.06              | 5.4 ± 0.0 | 14.7 ± 0.1        |
